# Supplementary material for: Not All That Glitters Is Gold: Barcoding Effort Reveals Taxonomic Incongruences in Iconic Ross Sea Sea Stars
Source: MDPI journal article supplement (doi:10.3390/d14060457), 2022-06-07

## 1) Tree topology with species partition results

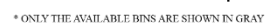

## 2) ABGD results

| GROUP      | N  | SAMPLE ID                                                                                                                                                                                                                                                                                                                                                                                                                                                                                                                                                                             | SPECIES                   |
|------------|----|---------------------------------------------------------------------------------------------------------------------------------------------------------------------------------------------------------------------------------------------------------------------------------------------------------------------------------------------------------------------------------------------------------------------------------------------------------------------------------------------------------------------------------------------------------------------------------------|---------------------------|
| Group[ 1 ] | 3  | GQ294377_1 GQ294341_1 GQ294342_1                                                                                                                                                                                                                                                                                                                                                                                                                                                                                                                                                      | <i>O. meridionalis</i> V  |
| Group[ 2 ] | 1  | GQ294370_1                                                                                                                                                                                                                                                                                                                                                                                                                                                                                                                                                                            | <i>O. meridionalis</i> VI |
| Group[ 3 ] | 4  | NZEC743_09 NZEC744_09 NZEC745_09 NZEC746_09                                                                                                                                                                                                                                                                                                                                                                                                                                                                                                                                           | <i>O. roseus</i> II       |
| Group[ 4 ] | 22 | GQ294389_1 MNA03812 NZEC742_09 MNA05817<br>MNA06490 MNA08033 GQ294359_1 MNA02814<br>MNA08037 GQ294390_1 GBMIN874_12 MNA06486<br>MNA08024 MNA03791 MNA03832 MNA03841<br>MNA08027 MNA08028 MNA08036 MNA08043<br>MNA08025 MNA08038                                                                                                                                                                                                                                                                                                                                                       | <i>O. roseus</i> I        |
| Group[ 5 ] | 51 | GQ294388_1 GQ294381_1 GQ294360_1 GQ294391_1<br>GQ294361_1 GQ294375_1 GQ294376_1 GQ294368_1<br>MNA04276 MNA08030 GQ294392_1 GQ294371_1<br>MNA04282 GQ294350_1 GQ294386_1 GQ294384_1<br>GQ294396_1 GQ294362_1 GQ294366_1 GQ294369_1<br>GQ294395_1 GQ294353_1 GQ294393_1 GBMIN878_12<br>MNA02902 GQ294385_1 GQ294345_1 MNA04283<br>MNA05430 MNA03430 MNA03582 MNA03825<br>MNA08021 MNA08022 MNA08026 MNA08029<br>MNA08031 MNA08035 GQ294351_1 GQ294349_1<br>GQ294387_1 GQ294352_1 GQ294373_1 GQ294374_1<br>GQ294383_1 GQ294347_1 GQ294348_1 GQ294380_1<br>GQ294394_1 GQ294346_1 MNA06331 | <i>O. validus</i>         |
| Group[ 6 ] | 11 | GQ294358_1 MNA06489 GQ294382_1 MNA08032<br>MNA08034 MNA08039 MNA08042 GQ294372_1<br>MNA06116 MNA08023 GQ294357_1                                                                                                                                                                                                                                                                                                                                                                                                                                                                      | <i>O. pearsei</i>         |
| Group[ 7 ] | 1  | GQ294355_1                                                                                                                                                                                                                                                                                                                                                                                                                                                                                                                                                                            | <i>O. penicillatus</i>    |
| Group[ 8 ] | 12 | GQ294378_1 GQ294364_1 GQ294365_1 GQ294354_1<br>GQ294356_1 GQ294363_1 GQ294343_1 GQ294340_1<br>GQ294379_1 GQ294344_1 GQ294339_1 GQ294367_1                                                                                                                                                                                                                                                                                                                                                                                                                                             | <i>O. penicillatus</i>    |

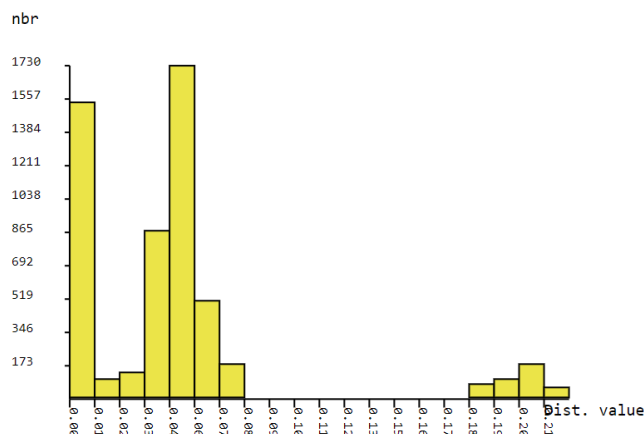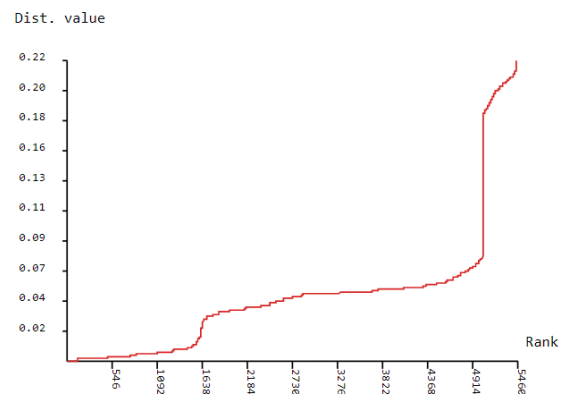

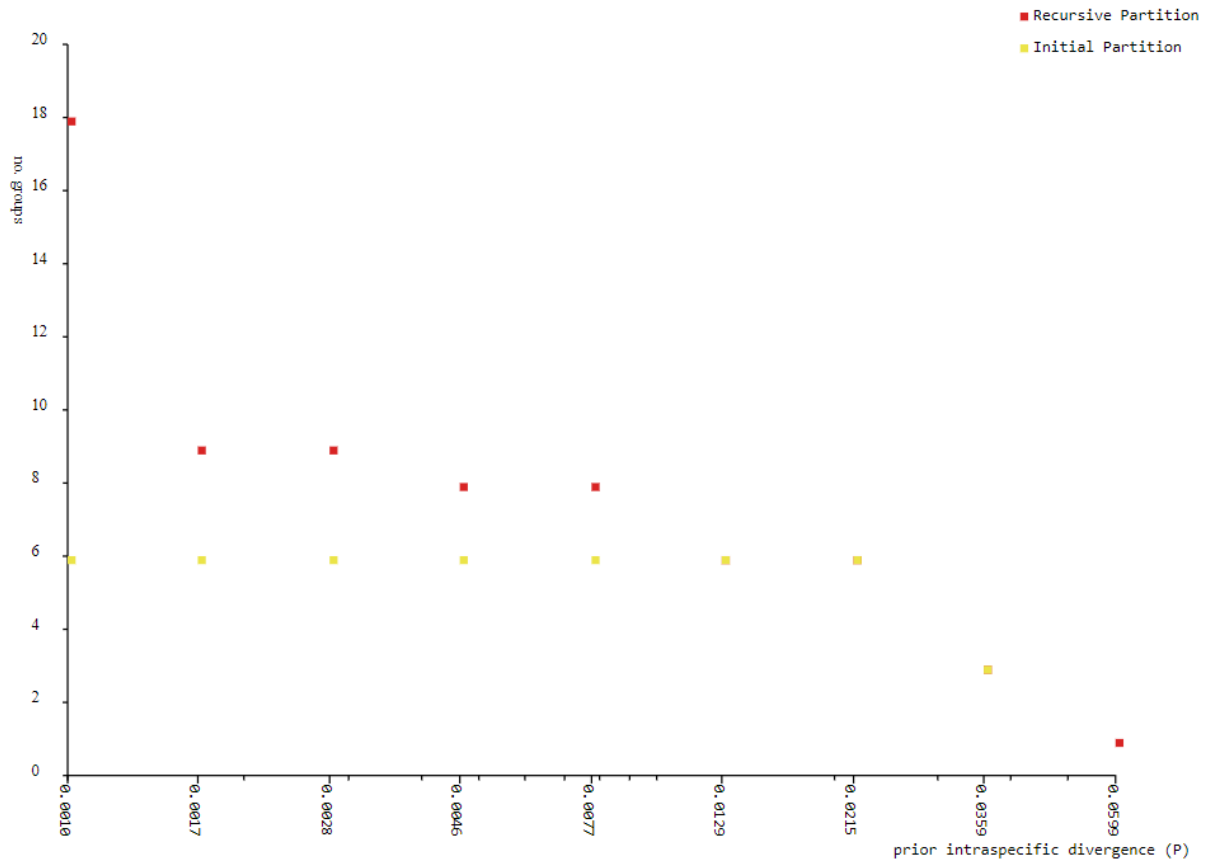

### 3) bPTP

| GROUP      | SUPPORT         | SAMPLE ID                                                                                                                                                                                                                                                                                                                                                                                                                                                                                                                                         | SPECIES                   |
|------------|-----------------|---------------------------------------------------------------------------------------------------------------------------------------------------------------------------------------------------------------------------------------------------------------------------------------------------------------------------------------------------------------------------------------------------------------------------------------------------------------------------------------------------------------------------------------------------|---------------------------|
| Species 1  | support = 1.000 | GQ294370_1                                                                                                                                                                                                                                                                                                                                                                                                                                                                                                                                        | <i>O. meridionalis</i> VI |
| Species 2  | support = 0.806 | GQ294342_1,GQ294377_1,GQ294341_1                                                                                                                                                                                                                                                                                                                                                                                                                                                                                                                  | <i>O. meridionalis</i> V  |
| Species 3  | support = 1.000 | MNA06489                                                                                                                                                                                                                                                                                                                                                                                                                                                                                                                                          | <i>O. pearsei</i>         |
| Species 4  | support = 0.504 | MNA08032,GQ294382_1                                                                                                                                                                                                                                                                                                                                                                                                                                                                                                                               | <i>O. pearsei</i>         |
| Species 5  | support = 1.000 | MNA08042                                                                                                                                                                                                                                                                                                                                                                                                                                                                                                                                          | <i>O. pearsei</i>         |
| Species 6  | support = 1.000 | MNA08023                                                                                                                                                                                                                                                                                                                                                                                                                                                                                                                                          | <i>O. pearsei</i>         |
| Species 7  | support = 1.000 | GQ294357_1                                                                                                                                                                                                                                                                                                                                                                                                                                                                                                                                        | <i>O. pearsei</i>         |
| Species 8  | support = 1.000 | MNA06116                                                                                                                                                                                                                                                                                                                                                                                                                                                                                                                                          | <i>O. pearsei</i>         |
| Species 9  | support = 0.970 | MNA08034,GQ294372_1                                                                                                                                                                                                                                                                                                                                                                                                                                                                                                                               | <i>O. pearsei</i>         |
| Species 10 | support = 1.000 | GQ294358_1                                                                                                                                                                                                                                                                                                                                                                                                                                                                                                                                        | <i>O. pearsei</i>         |
| Species 11 | support = 1.000 | MNA08039                                                                                                                                                                                                                                                                                                                                                                                                                                                                                                                                          | <i>O. pearsei</i>         |
| Species 12 | support = 0.084 | MNA03430,MNA04283,MNA02902,GBMIN878_12,GQ294385_1,MNA08026,MNA08031,GQ294384_1,GQ294345_1,GQ294362_1,GQ294352_1,GQ294387_1,GQ294391_1,GQ294388_1,MNA06331,GQ294346_1,GQ294383_1,GQ294373_1,MNA08030,MNA04276,GQ294350_1,GQ294380_1,GQ294394_1,MNA04282,GQ294347_1,GQ294374_1,GQ294381_1,GQ294360_1,GQ294348_1,GQ294386_1,GQ294393_1,GQ294392_1,GQ294371_1,GQ294353_1,MNA08029,MNA08021,MNA08035,GQ294351_1,GQ294368_1,GQ294395_1,GQ294366_1,GQ294375_1,GQ294376_1,MNA08022,MNA05430,GQ294369_1,MNA03825,MNA03582,GQ294349_1,GQ294396_1,GQ294361_1 | <i>O. validus</i>         |

|            |                 |                                                                                                                                                                                                                  |                        |
|------------|-----------------|------------------------------------------------------------------------------------------------------------------------------------------------------------------------------------------------------------------|------------------------|
| Species 13 | support = 0.467 | MNA03812,MNA08038,MNA08025,MNA06490,GQ294359_1,MNA05817,MNA08033,NZEC742_09,MNA08036,MNA03832,GQ294390_1,MNA06486,MNA08028,MNA03841,MNA08027,MNA08037,GBMIN874_12,MNA03791,MNA08024,MNA08043,MNA02814,GQ294389_1 | <i>O. roseus I</i>     |
| Species 14 | support = 0.687 | NZEC746_09,NZEC745_09,NZEC743_09,NZEC744_09                                                                                                                                                                      | <i>O. roseus II</i>    |
| Species 15 | support = 0.953 | GQ294355_1                                                                                                                                                                                                       | <i>O. penicillatus</i> |
| Species 16 | support = 0.895 | GQ294365_1,GQ294354_1,GQ294364_1,GQ294356_1,GQ294378_1,GQ294344_1,GQ294340_1,GQ294367_1,GQ294339_1,GQ294343_1,GQ294379_1,GQ294363_1                                                                              | <i>O. penicillatus</i> |

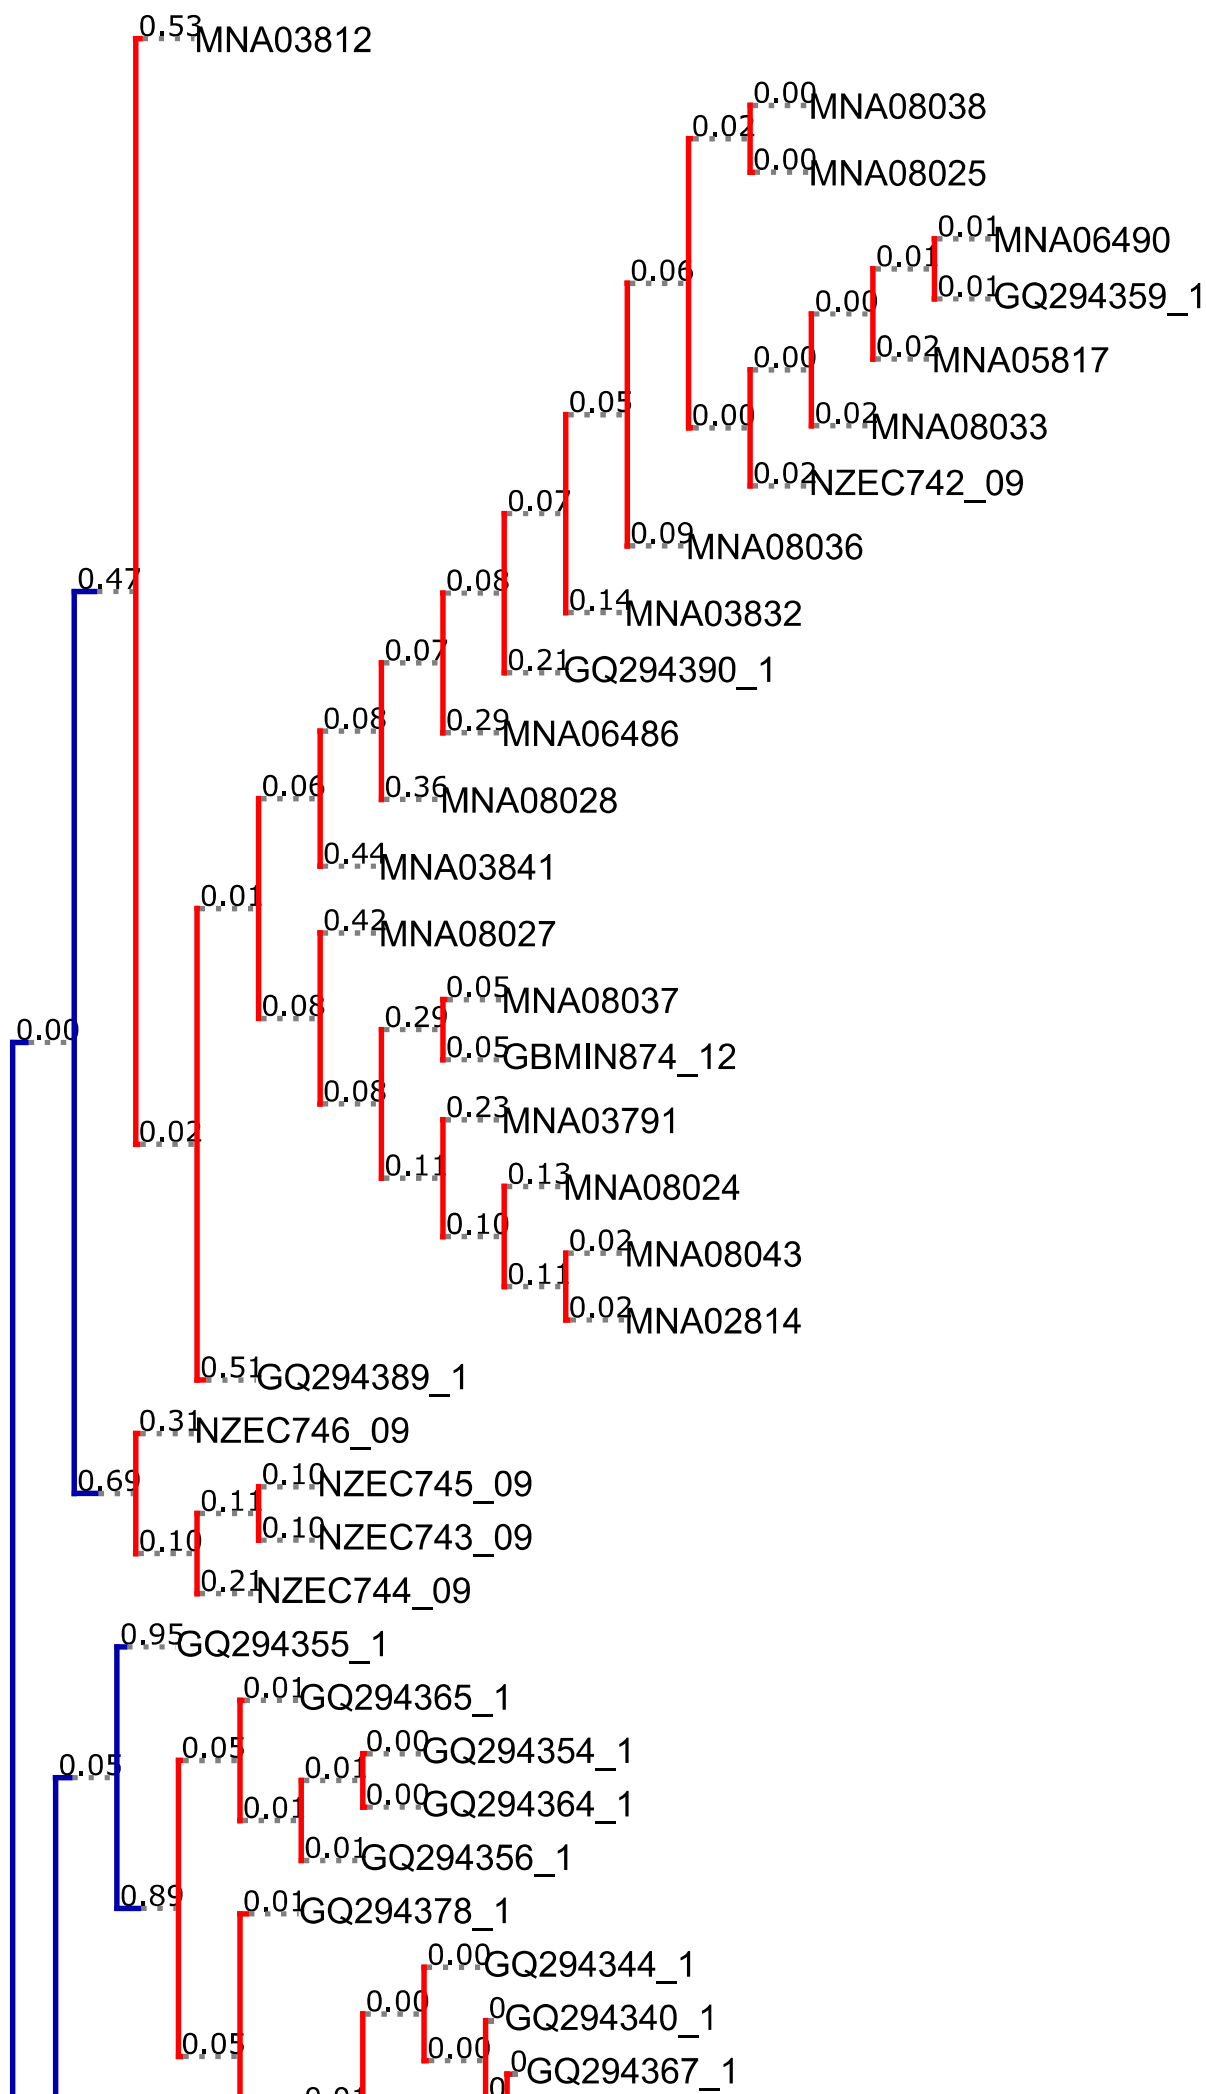

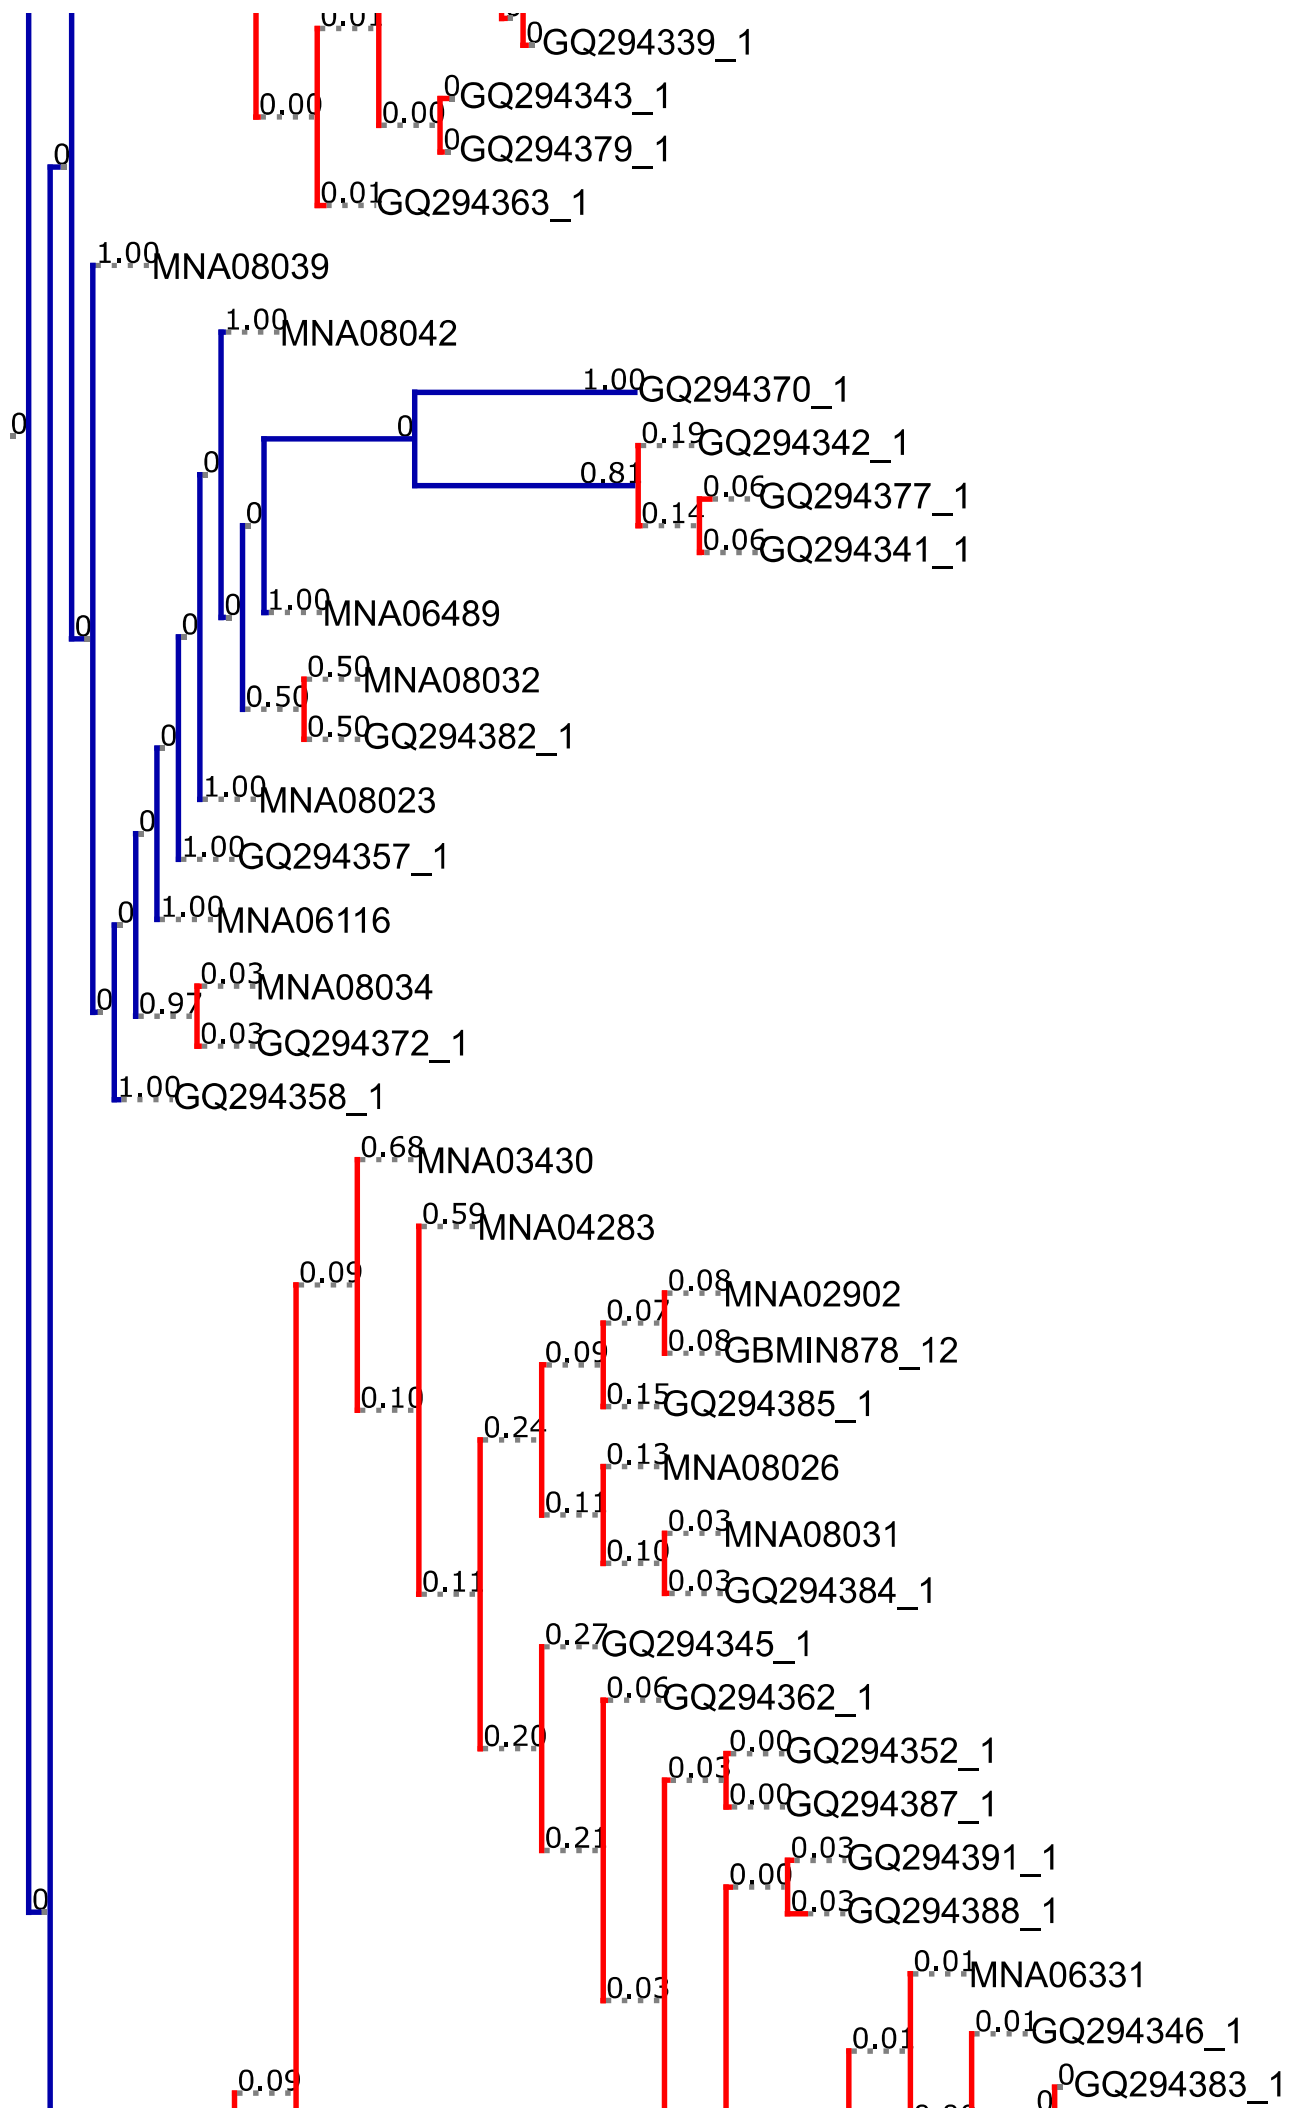

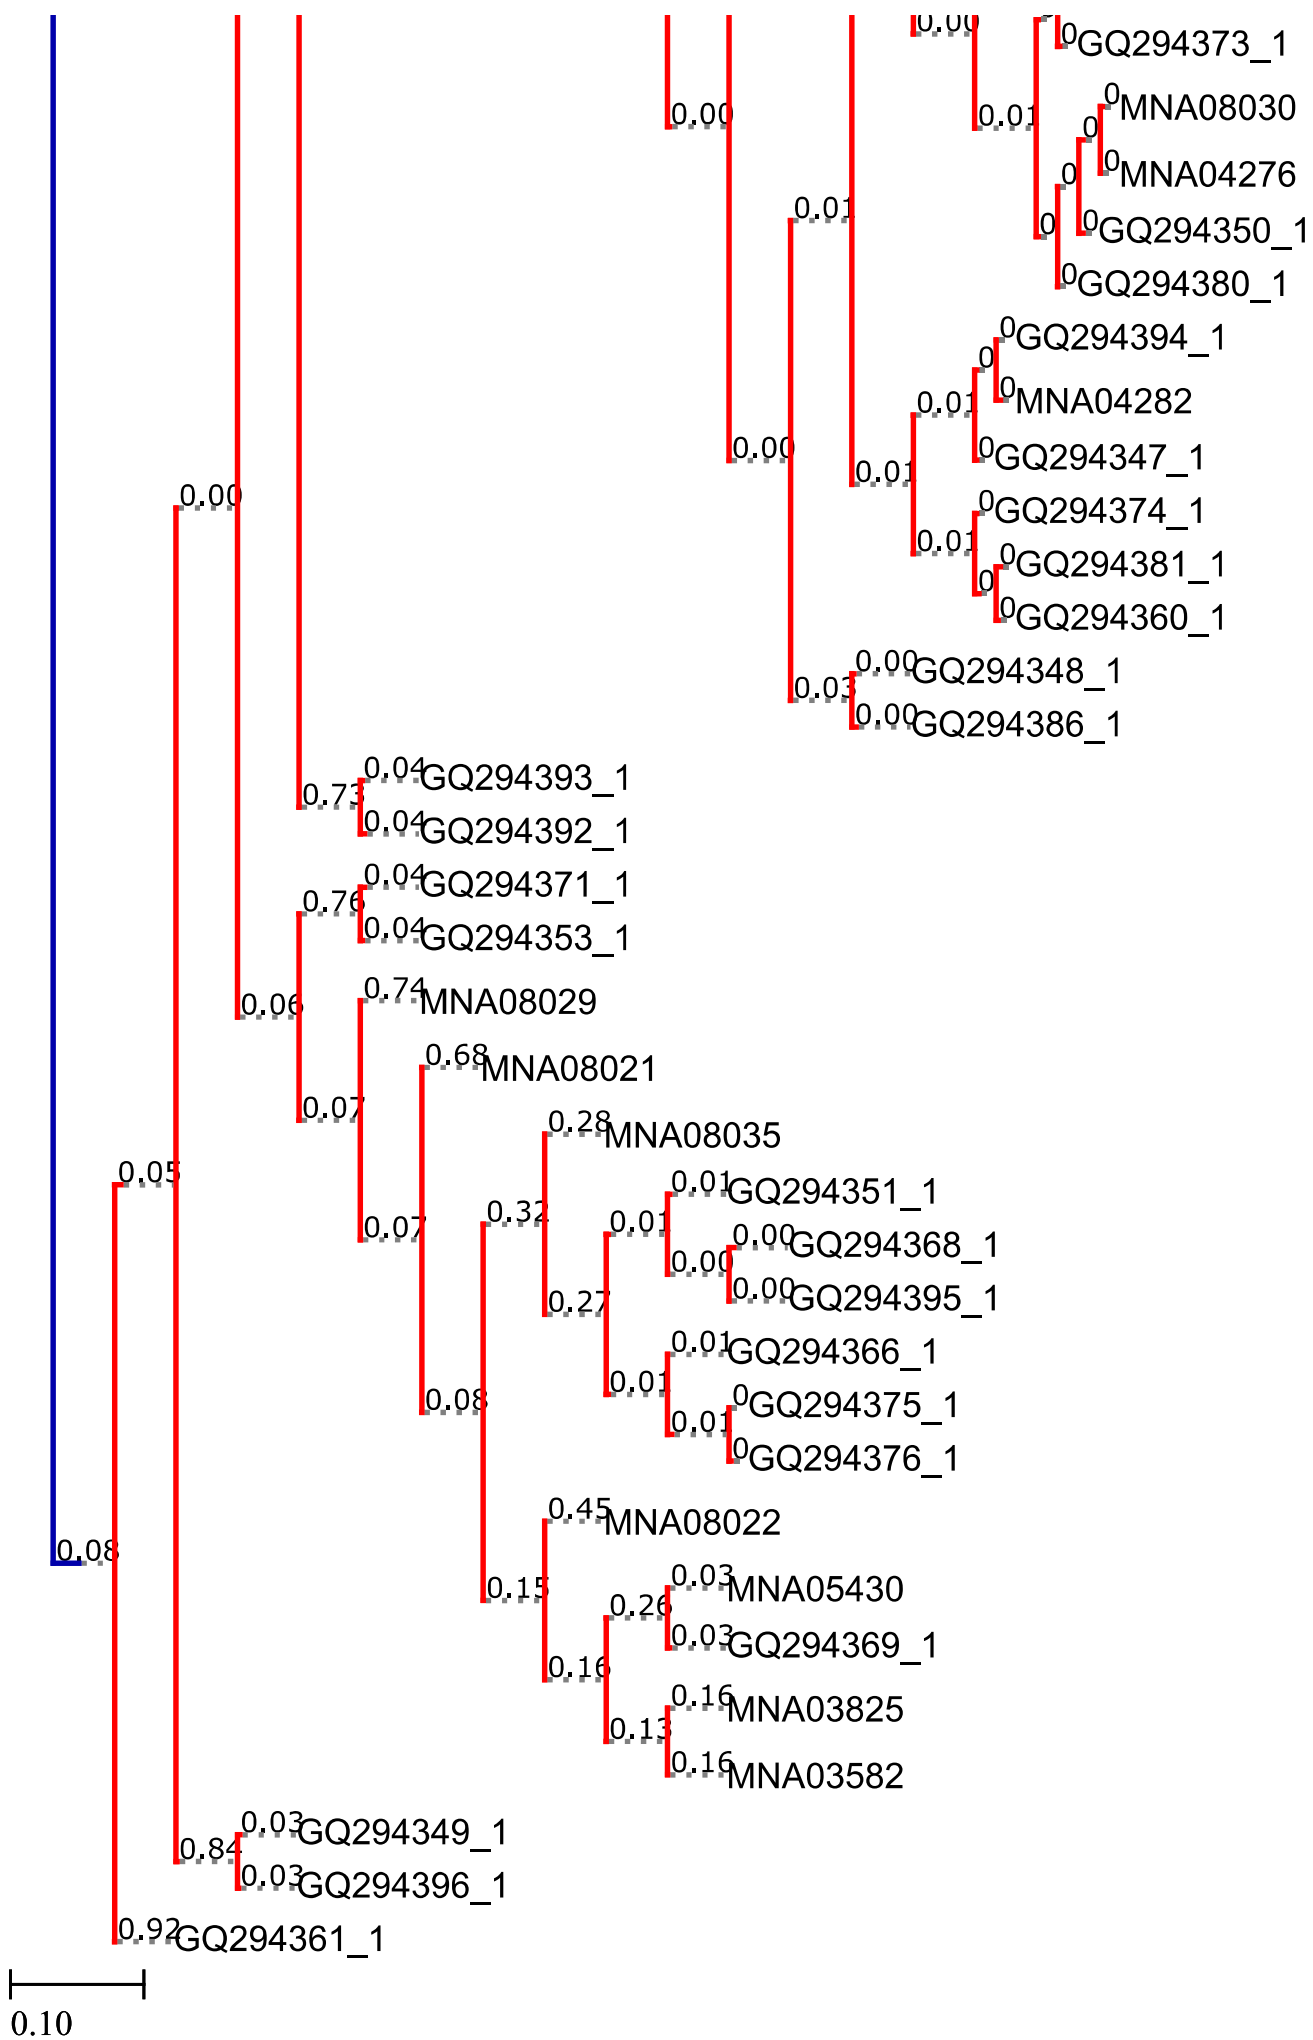

Supplement: s1 [file s1]
