# Supplementary material for: Not All That Glitters Is Gold: Barcoding Effort Reveals Taxonomic Incongruences in Iconic Ross Sea Sea Stars
Source: MDPI journal article supplement (doi:10.3390/d14060457), 2022-06-07
Supplement: s1 [file s1]

# File S2

## PARTITION SPECIES ANALYSIS

### 1) ABGD

| Group      | N  | Sample ID                           | Species           |
|------------|----|-------------------------------------|-------------------|
| Group[ 1 ] | 17 | MNA02814 MNA03791 MNA03812 MNA03832 | <i>O. roseus</i>  |
|            |    | MNA03841 MNA05817 MNA06486 MNA06490 |                   |
|            |    | MNA08024 MNA08025 MNA08027 MNA08028 |                   |
|            |    | MNA08033 MNA08036 MNA08037 MNA08038 |                   |
|            |    | MNA08043                            |                   |
| Group[ 2 ] | 16 | MNA02902 MNA03430 MNA03582 MNA03825 | <i>O. validus</i> |
|            |    | MNA04276 MNA04282 MNA04283 MNA05430 |                   |
|            |    | MNA06331 MNA08021 MNA08022 MNA08026 |                   |
|            |    | MNA08029 MNA08030 MNA08031 MNA08035 |                   |
|            |    | MNA06116 MNA06489 MNA08023 MNA08032 |                   |
| Group[ 3 ] | 7  | MNA08034 MNA08039 MNA08042          | <i>O. pearsei</i> |
|            |    |                                     |                   |

Histogram of distances

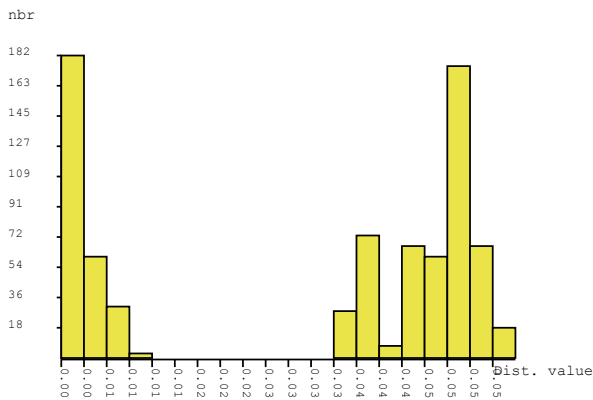

Ranked distances

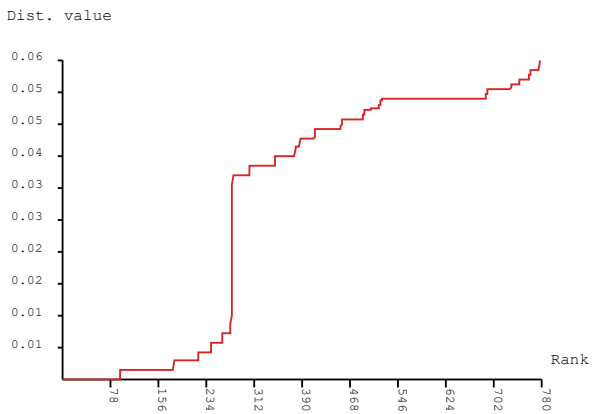

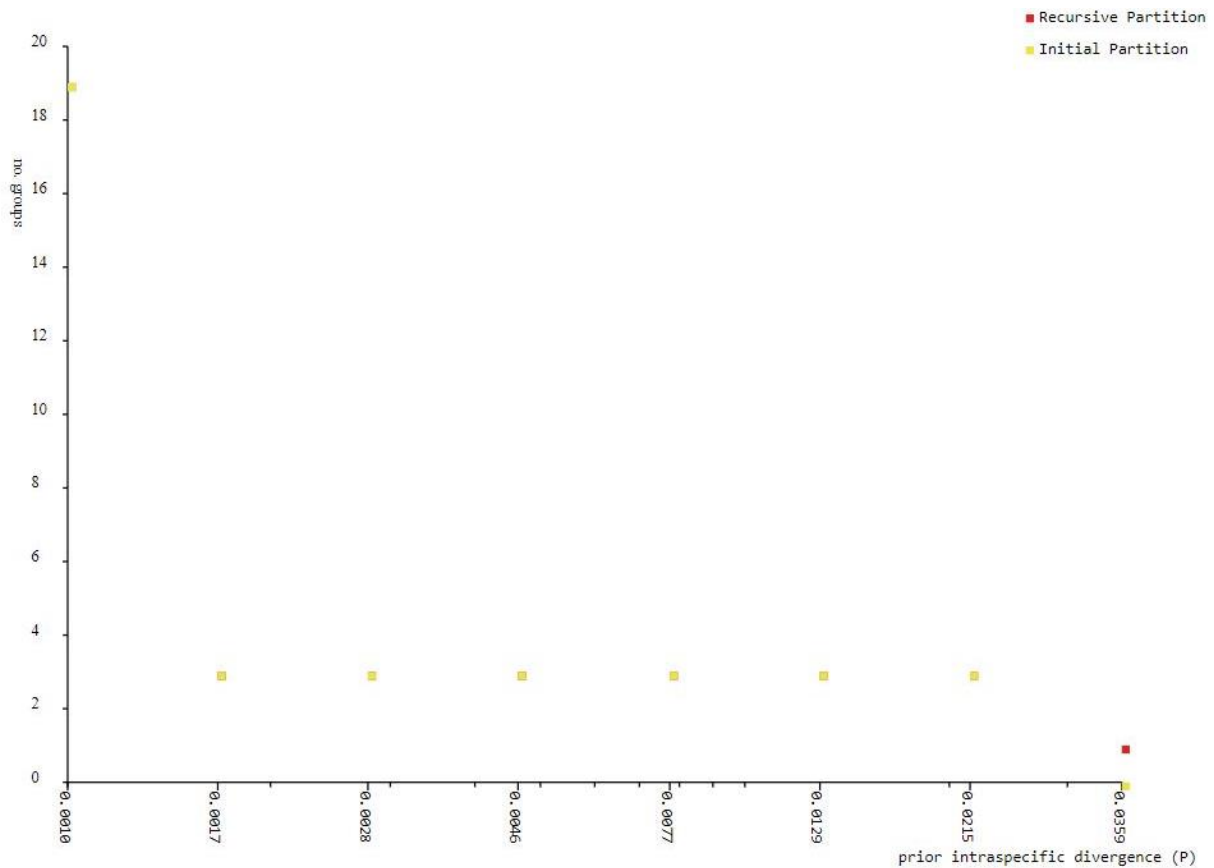

## 2) bPTP

### Species 1 (support = 0.653)

MNA03812,MNA08037,MNA08025,MNA08038,MNA08027,MNA03832,MNA08024,MNA06490,MNA08033,MNA05817,MNA06486,MNA03791,MNA03841,MNA08028,MNA08036,MNA08043,MNA02814

### Species 2 (support = 0.633)

MNA08035,MNA02902,MNA08031,MNA08029,MNA08026,MNA08022,MNA08021,MNA03825,MNA03582,MNA03430,MNA05430,MNA04283,MNA04282,MNA06331,MNA04276,MNA08030

### Species 3 (support = 0.947)

MNA08042,MNA08039,MNA08032,MNA06489,MNA06116,MNA08023,MNA08034

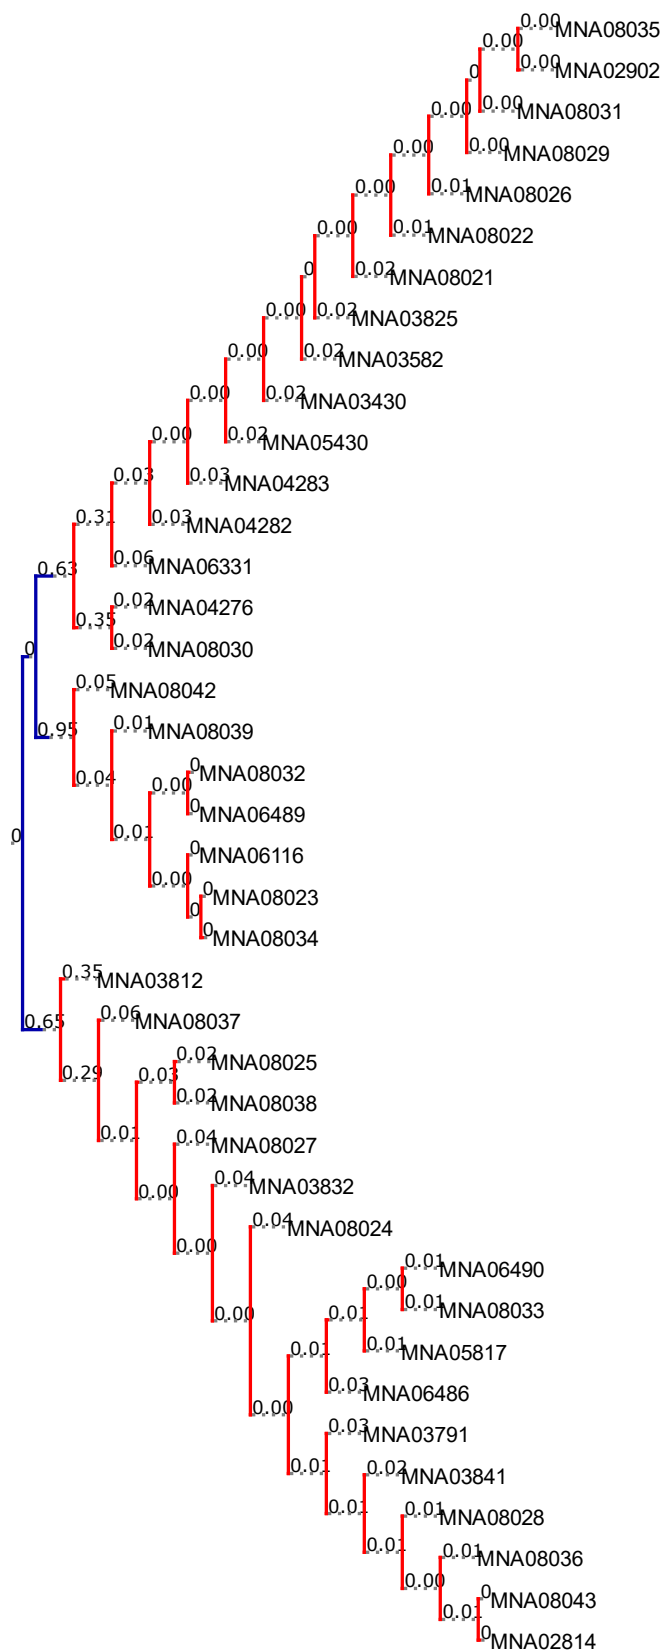

0.10
